# Supplementary material for: Formal education, previous interaction and perception influence the attitudes of people toward the conservation of snakes in a large urban center of northeastern Brazil
Source: Springer Nature journal article supplement (doi:10.1186/s13002-016-0096-9), 2016-06-20
Supplement: MOESM1 [file 10276756]

**Additional file 1.** Questionnaire used in the data collection NUROF-UFC visitors in the 2010–2013.

**QUESTIONNAIRE - Translate version (English)**

**01)** Age: \_\_\_\_\_.

Sex:  Male  Female

Level of Education:

Basic Education:  1<sup>a</sup>  2<sup>a</sup>  3<sup>a</sup>  4<sup>a</sup>  5<sup>a</sup>  6<sup>a</sup>  7<sup>a</sup>  8<sup>a</sup>  9<sup>a</sup>

Secondary School:  1<sup>o</sup>  2<sup>o</sup>  3<sup>o</sup>

Higher Education:  Graduation  Masters Degree  Doctorate

**02)** Write in a word your feeling when you see snakes in the exhibition of the NUROF:

\_\_\_\_\_.

**03)** Have you ever heard of NUROF-UFC before this visit?

YES  NO

**04)** Do you know the name of any snake?

YES / Which one? \_\_\_\_\_.

NO

**05)** Have you ever faced a snake before your visitation in NUROF-UFC?

YES / Where? \_\_\_\_\_. What snake did you see? \_\_\_\_\_.

NO

**06)** Do you know what to do if you find a snake that is outside of their natural habitat, a house, for example?

YES / What to do? \_\_\_\_\_.

NO

**07)** Have you ever saw someone killing a snake?

YES  NO

**08)** Are you afraid of snakes?

NO  LITTLE  VERY  PANIC

**09)** What subject related to snakes raises more your curiosity?

REPRODUCTION  FEEDING  DIVERSITY

ACCIDENT RISK  MYTHS AND LEGENDS

**10)** Do you think that the preservation of snakes is important?

YES  NO

Thanks!

**Additional file 1.** Questionnaire used in the data collection NUROF-UFC visitors in the 2010–2013.

**QUESTIONNAIRE – Original version (Brazilian Portuguese)**

**01)** Idade: \_\_\_\_\_.

Sexo:  Masculino  Feminino

Escolaridade:

Ens. Fundamental:  1ª  2ª  3ª  4ª  5ª  6ª  7ª  8ª  9ª

Ens. Médio:  1º  2º  3º

Ens. Superior:  Graduação  Mestrado  Doutorado

**02)** Escreva em uma palavra seu sentimento ao ver as serpentes na exposição do NUROF:

\_\_\_\_\_.

**03)** Você já tinha ouvido falar do NUROF antes dessa visita?

SIM  NÃO

**04)** Você sabe o nome de alguma serpente?

SIM / Qual? \_\_\_\_\_.

NÃO

**05)** Você já tinha se deparado com uma serpente antes da visita ao NUROF?

SIM / Onde foi? \_\_\_\_\_. Qual serpente você viu? \_\_\_\_\_.

NÃO

**06)** Você sabe o que fazer ao se deparar com uma serpente que esteja fora de seu habitat natural, uma casa, por exemplo?

SIM / O que fazer? \_\_\_\_\_.

NÃO

**07)** Você já presenciou alguém matando uma serpente?

SIM  NÃO

**08)** Você tem medo de serpentes?

NÃO  POUCO  MUITO  PÂNICO

**09)** O que relacionado às serpentes lhe desperta mais curiosidade?

REPRODUÇÃO  ALIMENTAÇÃO  DIVERSIDADE

RISCO DE ACIDENTES  MITOS E LENDAS

**10)** Você acha que a preservação das serpentes é importante?

SIM  NÃO

Obrigado!
